# Supplementary material for: Energy efficient role of Ni/NiO in PdNi nano catalyst used in alkaline DEFC
Source: Royal Society of Chemistry journal article supplement (doi:10.1039/c3ta12708g), 2013-11-13
Supplement: c3ta12708g.pdf [file c3ta12708g.pdf]

## **Energy efficient role of Ni/NiO in PdNi nano catalyst used in alkaline DEFC**

Abhijit Dutta and Jayati Datta

Electrochemistry & Fuel cell Laboratory, Department of Chemistry, Bengal Engineering and Science University, Shibpur,

Howrah – 711 103, West Bengal, India

Corresponding Authors: jayati\_datta@rediffmail.com (J Datta), [ad.chem@yahoo.com](mailto:ad.chem@yahoo.com) (A.Dutta)

### XRD analysis for calculation of Lattice parameters

The crystalline structures of the supported catalysts were revealed through the powder XRD technique using SEIFERT 2000 diffractometer operating with  $\text{CuK}\alpha$  radiation ( $\lambda = 0.1540 \text{ nm}$ ) generated at 35 kV and 30 mA. Scans were recorded at  $1^\circ \text{ min}^{-1}$  for  $2\theta$  values between 2 to 90 degrees, whereas the peak profile of the (220) reflection of Pd face-centered-cubic (f.c.c) structure (from  $62^\circ$  to  $75^\circ$ ) was also recorded at the very low scan rate of  $0.5^\circ \text{ min}^{-1}$  and fitted to a Rietveld algorithm optimizes<sup>1</sup> by using ‘Fullprof Suite Program (Version 2.05)’, so that the position of the peak maximum ( $\theta_{\text{max}}$ ) could be obtained precisely degree for alloying calculations. The peak position ( $\theta_{\text{max}}$ ) is obtained from curve fitting by using ‘Fullprof Suite Program (Version 2.05)’ software and used for the calculation of lattice parameter (Equation 1).

$$a = \frac{\sqrt{2}\lambda_{\text{K}\alpha}}{\text{Sin}\theta_{\text{max}}} \quad (1)$$

The fitted curve and their corresponding reliability factors (R-factors) have been included in Figure S1 and Table S1 respectively.

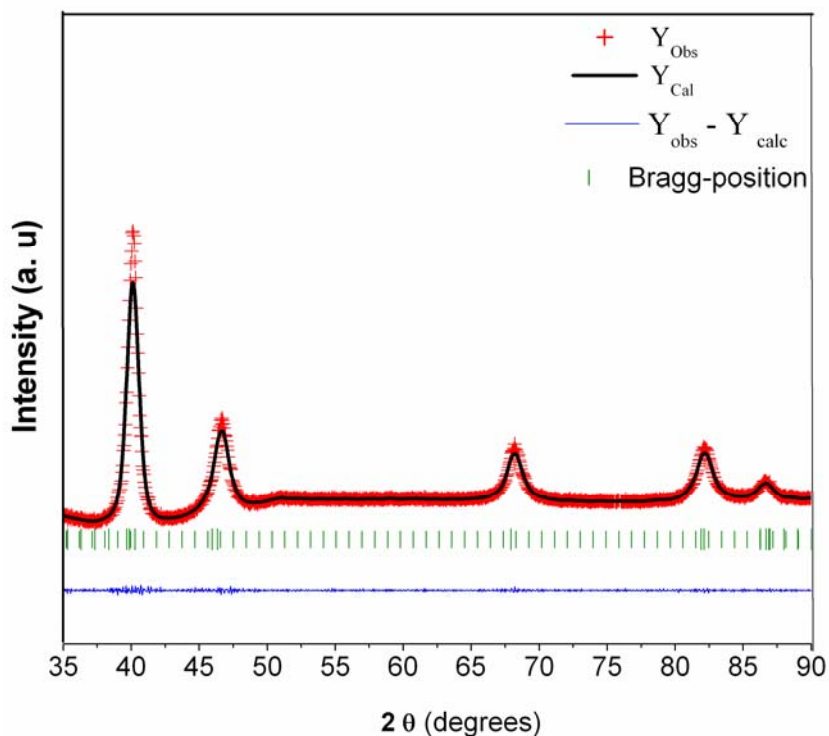

**Fig. S 1:** X-ray diffraction patterns fitted using the whole pattern profile matching method

| Electro-catalysts                       | Lattice Constant (nm) | (220) diffraction FWHM (deg) | R-factors<br>$R_p, R_{wp}, R_p, R_l, R_F$                                       |
|-----------------------------------------|-----------------------|------------------------------|---------------------------------------------------------------------------------|
| $\text{Pd}_{58}\text{Ni}_{42}/\text{C}$ | $0.38891 \pm 0.00002$ | $1.35255 \pm 0.00003$        | $R_p = 1.29$<br>$R_{wp} = 1.73$<br>$R_p = 1.81$<br>$R_l = 1.87$<br>$R_F = 2.19$ |
| $\text{Pd}_{37}\text{Ni}_{63}/\text{C}$ | $0.38731 \pm 0.00001$ | $1.33101 \pm 0.00003$        | $R_p = 1.89$<br>$R_{wp} = 2.33$<br>$R_p = 2.59$<br>$R_l = 2.66$<br>$R_F = 2.93$ |
| $\text{Pd}_{21}\text{Ni}_{79}/\text{C}$ | $0.38613 \pm 0.00001$ | $1.31273 \pm 0.00001$        | $R_p = 2.13$<br>$R_{wp} = 2.57$<br>$R_p = 2.65$<br>$R_l = 2.78$<br>$R_F = 2.99$ |

**Table S 1:** Lattice constant and FWHM of (220) phase of synthesized catalyst

Chronoamperometric Study:

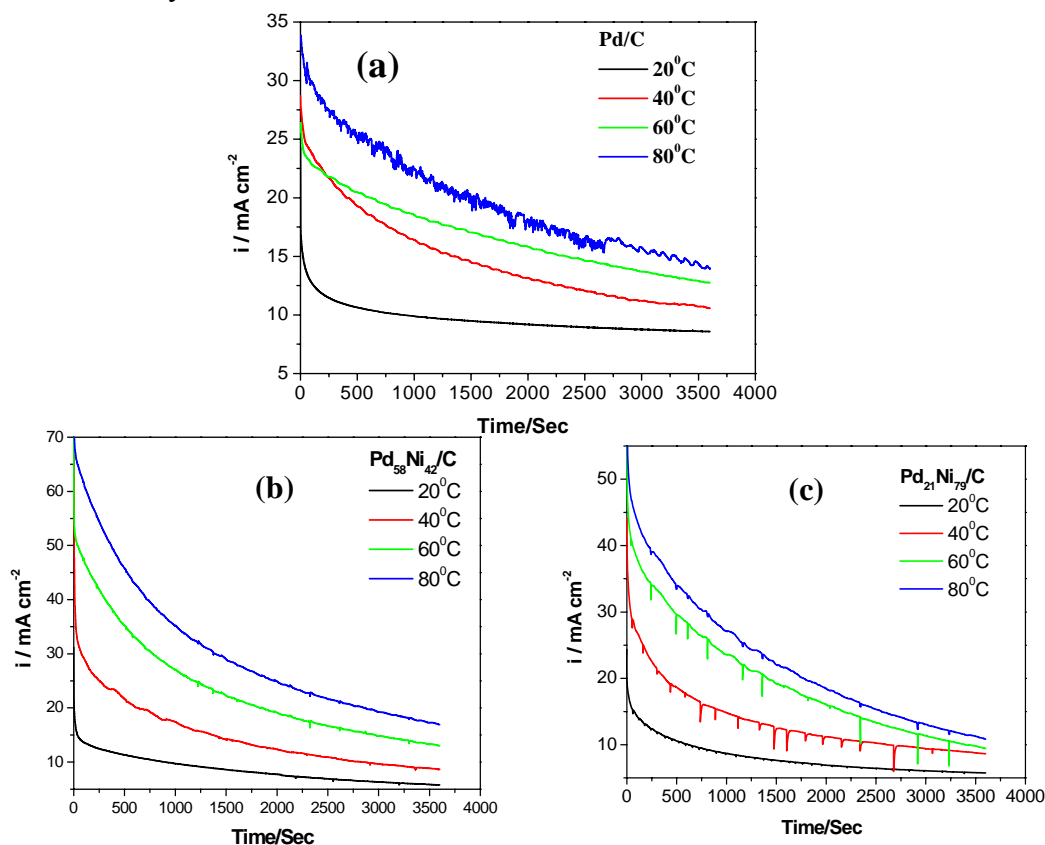

**Fig.S2.** Chronoamperometric studies of ethanol oxidation on (a) Pd/C (b)  $\text{Pd}_{58}\text{Ni}_{42}/\text{C}$  (c)  $\text{Pd}_{21}\text{Ni}_{79}/\text{C}$  electrodes at a constant potential of  $-300\text{mV}$  (vs. Hg.HgO) at different temperatures

### Impedance Spectroscopy:

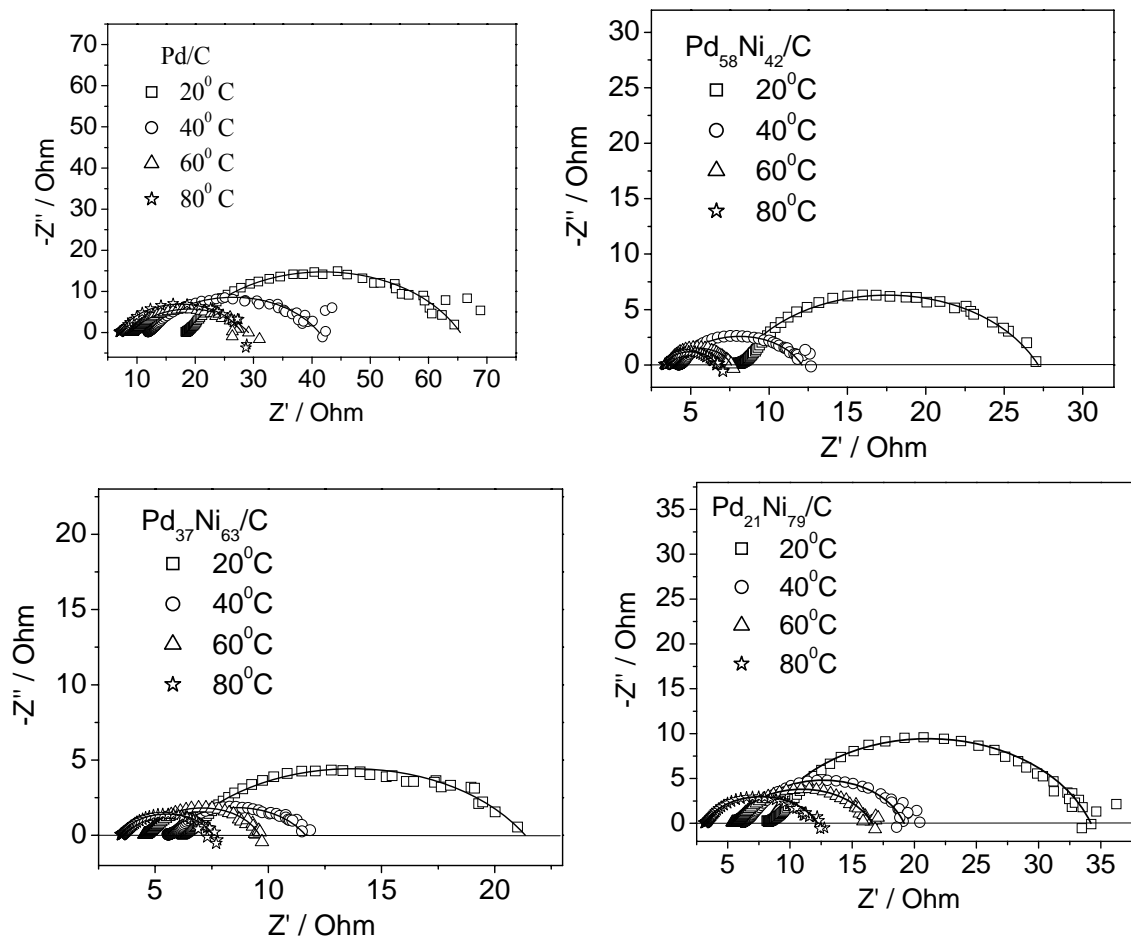

**Fig. S3:** Nyquist plots of ethanol oxidation in 0.5 M NaOH + 1.0 M EtOH at  $-0.3$  V for (a) Pd/C (b) Pd<sub>58</sub>Ni<sub>42</sub> (c) Pd<sub>37</sub>Ni<sub>63</sub> (d) Pd<sub>21</sub>Ni<sub>79</sub> at different temperatures.

### References:

- [1]. B. Tobey, *Int. Centre for Diffraction Data, Powder Diffr.*, 2006, 21, 67-70
